# Supplementary material for: Drivers of beta diversity in modern and ancient reef-associated soft-bottom environments
Source: PeerJ. 2020 May 14;8:e9139. doi: 10.7717/peerj.9139 (PMC7231500; doi:10.7717/peerj.9139)
Supplement: Supplemental Information 4 [file peerj-08-9139-s004.xlsx]

## Sheet: Cassian-Arten_Roden_et_al
Coll_number	Species	Sample	Specimens	latdec	lngdec
NMS PZO12554	Ampezzopleura bandeli	Rumerlo ski slope	2	46.5368	12.1021
NMS PZO12555	Kittliconcha? sp.	Rumerlo ski slope	2	46.5368	12.1021
NMS PZO12556	Camposcala biserta	Rumerlo ski slope	7	46.5368	12.1021
NMS PZO12557	Zygopleura hybridissima	Rumerlo ski slope	2	46.5368	12.1021
NMS PZO12558	Promathildia decorata	Rumerlo ski slope	3	46.5368	12.1021
NMS PZO12559	Fedaiella elongata	Rumerlo ski slope	3	46.5368	12.1021
NMS PZO12560	Zygopleura campoensis	Rumerlo ski slope	5	46.5368	12.1021
NMS PZO12561	Neritaria plicatilis	Rumerlo ski slope	2	46.5368	12.1021
NMS PZO12562	Popenella misurina	Rumerlo ski slope	1	46.5368	12.1021
NMS PZO12563	Stuorilda tichyi	Rumerlo ski slope	1	46.5368	12.1021
NMS PZO12564	Rinaldoconchus bieleri	Rumerlo ski slope	1	46.5368	12.1021
NMS PZO12565	Costactaeon n. sp.	Rumerlo ski slope	4	46.5368	12.1021
NMS PZO12566	Domerionina sp. 1	Costalaresc	3	46.5399	12.1639
NMS PZO12567	Domerionina stuorense	Costalaresc	16	46.5399	12.1639
NMS PZO12568	Atorcula anoptychopsis	Costalaresc	5	46.5399	12.1639
NMS PZO12569	Ampezzopleura hybridopsis	Costalaresc	7	46.5399	12.1639
NMS PZO12570	Dentineritaria neritina	Costalaresc	18	46.5399	12.1639
NMS PZO12571	Ampezzopleura bandeli	Costalaresc	4	46.5399	12.1639
NMS PZO12572	Palaeonucula sp. 2	Costalaresc	10	46.5399	12.1639
NMS PZO12573	Helenostylina convexa	Costalaresc	230	46.5399	12.1639
NMS PZO12574	Spirostylus brevior	Costalaresc	3	46.5399	12.1639
NMS PZO12575	Plagioglypta undulata	Costalaresc	9	46.5399	12.1639
NMS PZO12576	Neritaria mandelslohi	Costalaresc	10	46.5399	12.1639
NMS PZO12577	Domerionina sp. 1	Picolbach	22	46.5343	11.9225
NMS PZO12578	Domerionina pralongiana	Picolbach	15	46.5343	11.9225
NMS PZO12579	Domerionina stuorense	Picolbach	59	46.5343	11.9225
NMS PZO12580	Palaeonucula sp. 1	Picolbach	23	46.5343	11.9225
NMS PZO12581	Plagioglypta undulata	Picolbach	24	46.5343	11.9225
NMS PZO12582	Neritaria mandelslohi	Picolbach	10	46.5343	11.9225
NMS PZO12583	Stuorilda cassiana	Picolbach	10	46.5343	11.9225
NMS PZO12584	Azyga dolomitensis	Picolbach	15	46.5343	11.9225
NMS PZO12585	Caenogastropoda sp. 1	Picolbach	24	46.5343	11.9225
NMS PZO12586	Helenostylina convexa	Picolbach	11	46.5343	11.9225
NMS PZO12587	Costactaeon n. sp.	Rumerlo cliff	35	46.5337	12.0988
NMS PZO12588	Ruganeritaria subovata	Rumerlo cliff	48	46.5337	12.0988
NMS PZO12589	Stuorilda cassiana	Rumerlo cliff	30	46.5337	12.0988
NMS PZO12590	Camposcala biserta	Rumerlo cliff	50	46.5337	12.0988
NMS PZO12591	Zygopleura depressa	Rumerlo cliff	20	46.5337	12.0988
NMS PZO12592	Tofanella cancellata	Rumerlo cliff	9	46.5337	12.0988
NMS PZO12593	Teretrina cf. bolina	Rumerlo cliff	9	46.5337	12.0988
NMS PZO12594	Domerionina n. sp.	Rumerlo cliff	5	46.5337	12.0988
NMS PZO12595	Prostylifer paludinaris	Rumerlo cliff	7	46.5337	12.0988
NMS PZO12596	Coelostylina conica	Rumerlo cliff	6	46.5337	12.0988
NMS PZO12597	Palaeonucula sp. 1	Rumerlo cliff	5	46.5337	12.0988
NMS PZO12598	Frederikella cancellata	Rumerlo cliff	5	46.5337	12.0988
